# Supplementary material
Source: HighWire-hosted journal article supplement (https://bibliotheek.ehb.be/content/suppl/2020/12/04/bmjgh-2020-003097)
Supplement: bmjgh-2020-003097supp001_data_supplement.pdf [file bmjgh-2020-003097supp001_data_supplement.pdf]

## **Infection and mortality of health care workers worldwide from COVID-19: a scoping review**

### **Citation**

Soham Bandyopadhyay, Aditi Aggarwal, Archith Kamath, David Kim, Duha Jasim, Grace Brown, Henna Reddy, Hibatullah Abuelgasim, Isabel Tol, Leenah Abuelgasim, Murtaza Kadhum, Najlaa Abu Jamie, Omaina Ali, Osaid Alser, Sai Arathi Parepalli, Samuel Scott, Sophie Roche, Sofia Gandino, Sara Iharchane, Yethrib Mohamed, Alexandra Knighton, Lydia Benazaize, Eve Thangaraj, Dorothy Bbaale, Zara Markovic-Obiago, Kiran Saini, Mary Kumarendran, Elliott Taylor, Mariam Gaddah, Khalil Khalidy, Mohammad Rabiul Karim Khan Papon, Daniel Ojuka, Justino Regalado, Arturo Viniegra, Sonam Kelzang, Emery Manirambona, Riley Dean, Alicia Sigler, Tazeen Ahsan, Faith Muchemwa, Mario Moran Romero, Luciano Nahas, Amanda Gosman, Abdullah Saleh, Ronnie E. Baticulon, Kokila Lakhoo, Anant Jani, Roba Khundkar. Infection and mortality of health care workers worldwide from COVID-19: a scoping review.

### **Review question(s)**

Our primary aim is to perform a scoping review to estimate the number and proportion of health care workers who have become infected with COVID-19 in every country in the world.

Our secondary aims are:

- (1) to establish health care worker mortality rate linked to COVID-19 in every country in the world, and
- (2) to identify factors that could be linked to levels of infection and mortality of health care workers between countries.

### **Searches**

A full systematic search of bibliographic databases will be performed - Embase and MEDLINE. All databases will be searched from 17<sup>th</sup> November 2019 to 22<sup>nd</sup> April 2020 without language restriction for all terms related to health care workers and COVID-19 (Appendix S1). The search results will be merged, and duplicate citations will be discarded. Titles and abstracts will be screened by two reviewers independently based on the pre-defined inclusion and exclusion criteria. The full text of the remaining articles will be retrieved and screened by two reviewers independently. Conflicts are to be resolved by mutual agreement or by a third reviewer. The reference lists of included documents will be examined to identify any further relevant documents missed through the above search strategy.

A grey literature search of WHO documents, government documents, and non-governmental organisation documents will also be conducted. Social media sites, media websites, and google will be utilised to find these documents and cross-reference sources. All documents

will be collected by two reviewers independently. The reference lists of included documents will be examined to identify any further relevant documents missed through the above search strategy. The inclusion of the documents and data extracted from them will be compared between the two reviewers and validated by a third reviewer.

The search strategy outlined above will be performed by individuals who have experience in research methodologies. All reviewers will attend an online training and support session delivered by SB and RK before performing any searches. The Preferred Reporting Items for Systematic Reviews and Meta-Analysis extension for Scoping Reviews (PRISMA-ScR) guidelines will be used to write and report the findings

### **Inclusion Criteria:**

#### **Types of study to be included**

All studies, synopses of studies, synthesis, synopses of synthesis, and summaries are eligible to be included. Primary data – where available – will be eligible for inclusion

Studies will be excluded if they do not use real human data or do not state their methodology.

#### **Condition(s) or domain(s) to be included**

The infection and mortality of health care workers associated with COVID-19 in all country settings. For the purposes of this review, a country is that which is recognised by the United Nations (UN) to be a sovereign country.

#### **Participants/population to be included:**

##### **Inclusion:**

- Health care workers. For the purposes of this review, a health care worker is one who delivers care and services to the sick and ailing either directly as paramedics, nurses and doctors, or indirectly as aides, helpers, laboratory technicians, and medical waste handlers.

##### **Exclusion:**

- Animal studies
- Statistical modelling

#### **Intervention(s), exposure(s)**

COVID-19 in a health care worker

#### **Comparator(s)/control**

Not applicable

### **Context**

This review includes settings at all levels of development. It considers low-, middle-, and high-socio-demographic index (SDI) countries

### **Main outcome(s)**

1. COVID 19 infections in healthcare workers (a) worldwide and (b) by country
2. Healthcare workers deaths related to COVID 19 (could be with or from) (a) worldwide and (b) by country

### **\*Measures of effect**

There is no restriction on time to mortality outcome

### **Additional outcome(s)**

Demographics of health care workers who have been (a) infected with and (b) died from COVID-19

Factors that could be linked to infection and mortality of health care workers with COVID-19

### **\*Measures of effect**

Not applicable

### **Data extraction (selection and coding)**

Using a pre-designed and pre-piloted data extraction form, data from each included document will be collected by two independent reviewers. Conflicts in data collection will be resolved by a third reviewer. From all included documents information will be extracted on study design, study setting, study population, participant demographics, timeframe of the study, date of publication, public health measures implemented, health care worker infected with COVID-19, health care worker mortality related to COVID-19, and information for assessment of the risk of bias.

### **Risk of bias (quality) assessment**

Two reviewers will independently classify the risk of bias in each included document using the risk of bias in randomised trials 2 (ROB 2) tool, risk of bias in non-randomised studies (ROBINS I) tool, assessing the methodological quality of systematic reviews (AMSTAR) tool, and AACODS checklist as appropriate. Documents will be graded as high (bias is very

likely due to essential errors), moderate (no essential deficiencies, but not all criteria are met), low (bias is unlikely), or unclear.

The reviewers will discuss and resolve any disagreements with the level of bias in a study.

### **Strategy for data synthesis**

A random effects model will be used to pool mortality and infection rates. Where possible, associations will be analysed by computing and/or pooling this estimation using a random effects meta-analysis.

Health care workforce deaths due to COVID-19 as a proportion of total population deaths due to COVID-19 will be calculated. Health care workforce deaths due to COVID-19 as a proportion of all health care work force COVID-19 infections and health care workforce deaths due to COVID-19 as a proportion of the total healthcare workforce will be calculated and compared to publicly available total population data. Prevalence and risk ratios will be given.

### **Analysis of subgroups or subsets**

Where possible, subgroup analysis will be by region (by world bank), SDI status (low SDI country, middle SDI country, and high SDI country), age range (18-29; 30-39; 40-49; 50-59; 60-70), gender (male/female), ethnicity, type of healthcare worker, sub-specialities, and level of training.

### **Contact details for further information**

Soham Bandyopadhyay  
Soham.bandyopadhyay@yahoo.co.uk

### **Organisational affiliation of the review**

Oxford University Global Surgery Group, Nuffield Department of Surgical Sciences,  
University of Oxford

### **Review team members and their organisational affiliations**

Dr Soham Bandyopadhyay. Oxford University Global Surgery Group, Nuffield Department of Surgical Sciences, University of Oxford

Dr Aditi Aggarwal. Oxford University Global Surgery Group, Oxford University Hospitals NHS Foundation Trust

Mr Archith Kamath. Oxford University Global Surgery Group, University of Oxford

Mr David Kim. Oxford University Global Surgery Group, University of Oxford

Ms Duha Jasim. Oxford University Global Surgery Group, University of Oxford

Dr Grace Brown. Oxford University Global Surgery Group, Oxford University Hospitals NHS Foundation Trust

Ms Henna Reddy. Oxford University Global Surgery Group, University of Oxford

Ms Hibatullah Abuelgasim. Oxford University Global Surgery Group, University of Oxford

Dr Isabel Tol. Oxford University Global Surgery Group, Oxford University Hospitals NHS Foundation Trust

Ms Leenah Abuelgasim. Oxford University Global Surgery Group, University of Oxford

Mr Murtaza Kadhum. Oxford University Global Surgery Group, London

Ms Najlaa Abu Jamie. Gaza

Ms Omaina Ali. Oxford University Global Surgery Group, University of Oxford

Mr Osaïd Alser. Oxford University Global Surgery Group, Harvard

Ms Sai Arathi Parepalli. Oxford University Global Surgery Group, University of Oxford

Mr Samuel Scott. Oxford University Global Surgery Group, University of Oxford

Ms Sophie Roche. Oxford University Global Surgery Group, University of Oxford

Ms Sofia Gandino. Italy

Ms Sara Iharchane, Italy

Ms Yethrib Mohamed. University of Oxford

Ms Alexandra Knighton. University of Oxford

Dr Lydia Benazaize. Oxford University Global Surgery Group, Oxford University Hospitals NHS Foundation Trust

Dr Eve Thangaraj. Oxford University Global Surgery Group, Oxford University Hospitals NHS Foundation Trust

Dr Dorothy Bbaale. Uganda

Dr Zara Markovic-Obiagó. Oxford University Global Surgery Group, Oxford University Hospitals NHS Foundation Trust

Dr Kiran Saini. Oxford University Global Surgery Group, Oxford University Hospitals NHS Foundation Trust

Ms Mary Kumarendran. Oxford University Global Surgery Group

Mr Elliott Taylor. Oxford University Global Surgery Group, Nuffield Department of Surgical Sciences, University of Oxford

Dr Mariam Gaddah. Oxford University Global Surgery Group

Dr Emery Manirambona. Oxford University Global Surgery Group

Dr Khalil Khalidy. Gaza

Dr Daniel Ojuka. Kenya

Dr Mario Moran Romero. Mexico

Dr Luciano Nahas. Mexico

Dr Justino Regalado. Mexico

Dr Arturo Viniegra. Mexico

Dr Sonam Kelzang. Bhutan

Dr. Tazeen Ahsan, Upazilla health complex, Jessore, Bangladesh

Dr Mohammad Rabiul Karim Khan Papon. Sheikh Hasina National Institute of Burn and Plastic Surgery, Dhaka, Bangladesh

Dr, Alicia Sigler, Tijuana, Mexico

Dr Abdullah Saleh. University of Alberta, Canada

Dr. Ronnie E. Baticulon, University of the Philippines College of Medicine – Philippine General Hospital, Philippines  
Professor Faith Muchemwa, University of Zimbabwe College of Health Sciences, Zimbabwe  
Professor Amanda Gosman, University of California San Diego  
Professor Kokila Lakhoo, Oxford University Global Surgery Group, Nuffield Department of Surgical Sciences, University of Oxford  
Dr Anant Jani, Oxford University Global Surgery Group  
Dr Roba Khundkar, Oxford University Global Surgery Group, Nuffield Department of Surgical Sciences, University of Oxford

**Type and method of review**

Epidemiologic, Meta-analysis, Narrative synthesis, Systematic review

**Anticipated or actual start date**

20 April 2020

**Anticipated completion date**

10 May 2020

**Funding sources/ sponsors**

Not applicable

**Conflicts of interest**

None

**Language**

English

**Country**

Not applicable

**Stage of review**

Review Ongoing

**Subject index terms status**

Subject indexing assigned by CRD

## Subject index terms

These are assigned by the CRD

## Details of any existing review of the same topic by the same authors

## Appendix S1

- health care practitioner
- health care professional
- health care provider
- health care worker
- health personnel
- health profession personnel
- health worker
- healthcare personnel
- healthcare practitioner
- healthcare professional
- healthcare provider
- healthcare worker
- health care manpower
- health care work force
- health care workforce
- health labor force
- health labour force
- health manpower
- health work force
- healthcare labor force
- healthcare labour force
- healthcare manpower
- healthcare work force
- healthcare workforce
- medical manpower
- doctor
- medical practitioner
- physician associate
- physicians
- practitioner
- private physician
- nurse
- nurses' aides
- nursing aid

- nursing aide
- nursing assistants
- orderlies
- porters
- healthcare assistants
- physician assistant
- advanced clinical practitioner
- advanced practice clinician
- advanced practice professional
- allied health provider
- clinical associate
- limited-license practitioner
- mid-level practitioner
- mid-level provider
- non-physician practitioner
- non-physician provider
- physician extender
- care coordinator
- health care coordinator
- healthcare coordinator
- medical dispatcher
- accredited social health activist
- ASHA (accredited social health activist)
- ASHA workers
- auxiliary health worker
- barefoot doctor
- health practitioner
- health aides
- health officers
- medical auxiliary
- hospital personnel
- hospital employee
- hospital staff
- hospital staffing
- hospital worker
- personnel, hospital
- hospital administrator
- hospital volunteer
- medical staff
- hospital auxiliary worker
- hospitalists

- coroner
- medical assistant
- medical chaperone
- medical expert
- medical staff
- physician assistant
- psychotherapist
- physiotherapist
- occupational therapist
- pharmacist
- allied health personnel
- paramedical personnel
- para medical personnel
- paramedical assistant
- paramedical manpower
- paramedical professional
- paramedical staff
- psychiatric aides
- medical student
- student nurse
- corona
- coronavirus
- COVID
- COVID-19
- SARS-CoV-2
- pandemic
