# Supplementary material
Source: HighWire-hosted journal article supplement (https://bibliotheek.ehb.be/content/suppl/2020/12/04/bmjgh-2020-003097)
Supplement: bmjgh-2020-003097supp005_data_supplement.pdf [file bmjgh-2020-003097supp005_data_supplement.pdf]

**Appendix S5: The type and specific data points extracted in the systematic review process**

| <b>Data extracted</b>                              |                                                                                                                                                                                   |
|----------------------------------------------------|-----------------------------------------------------------------------------------------------------------------------------------------------------------------------------------|
| <b>Publication characteristics</b>                 | Title of publication<br>Year published<br>Authors<br>Country of origin<br>Type of publication                                                                                     |
| <b>Country-specific data</b>                       | Total number of healthcare workers<br>Total population<br>Number of total hospital beds available<br>Number of intensive care unit beds and ventilators available                 |
| <b>COVID-19 specific data</b>                      | Number of nationwide cases<br>Number of COVID-19 tests performed<br>Number of intensive care unit admissions<br>Mortality rates<br>Average length time for symptoms and admission |
| <b>Demographics of affected healthcare workers</b> | Age, sex, ethnicity, stage of training and role of each affected healthcare worker                                                                                                |
| <b>Public health measures</b>                      | Social distancing strategies<br>Testing, self-isolation and contact tracing<br>Travel restrictions<br>Stay at home orders                                                         |
| <b>Publication characteristics</b>                 | Title of publication<br>Year published<br>Authors<br>Country of origin<br>Type of publication                                                                                     |
