# Supplementary material
Source: HighWire-hosted journal article supplement (https://bibliotheek.ehb.be/content/suppl/2020/12/04/bmjgh-2020-003097)

**Appendix S9: Supplementary figures for the COVID-19 infections and deaths over time**

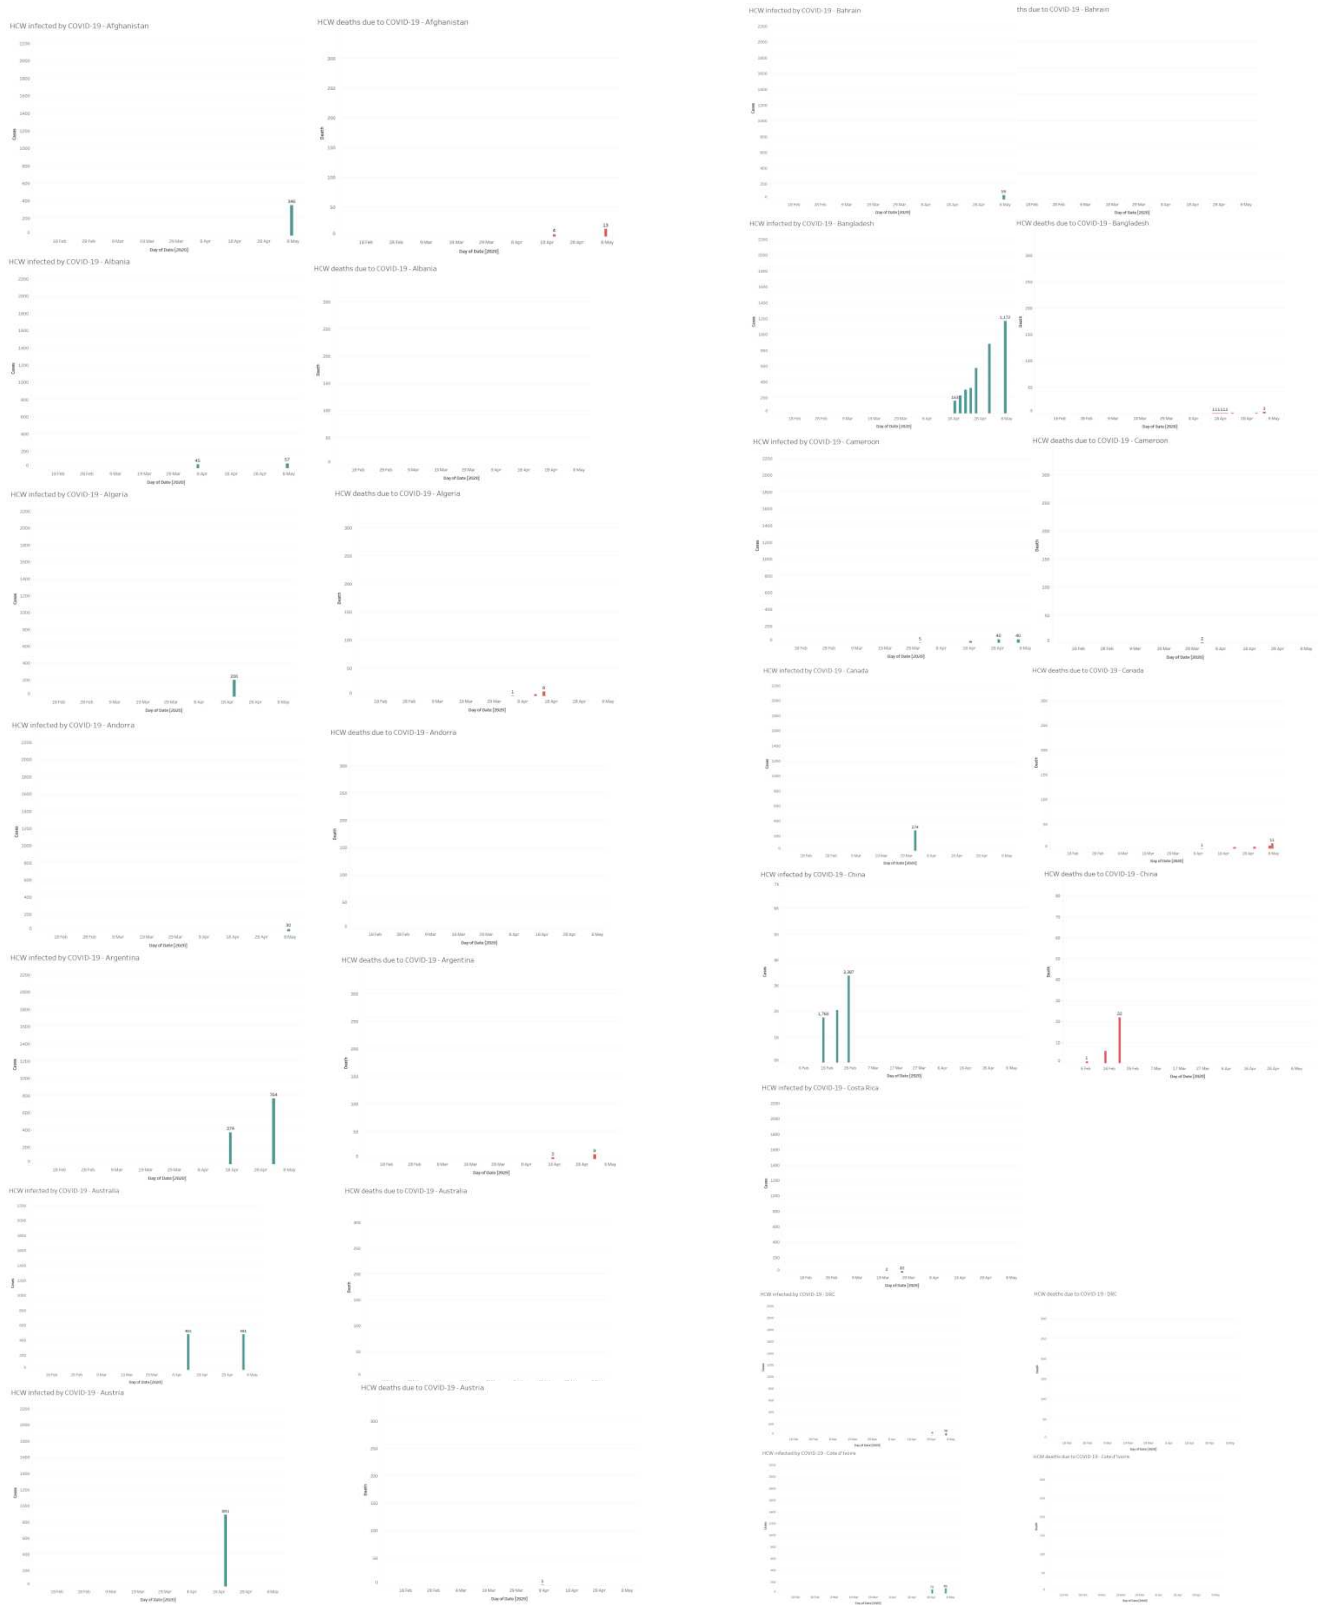

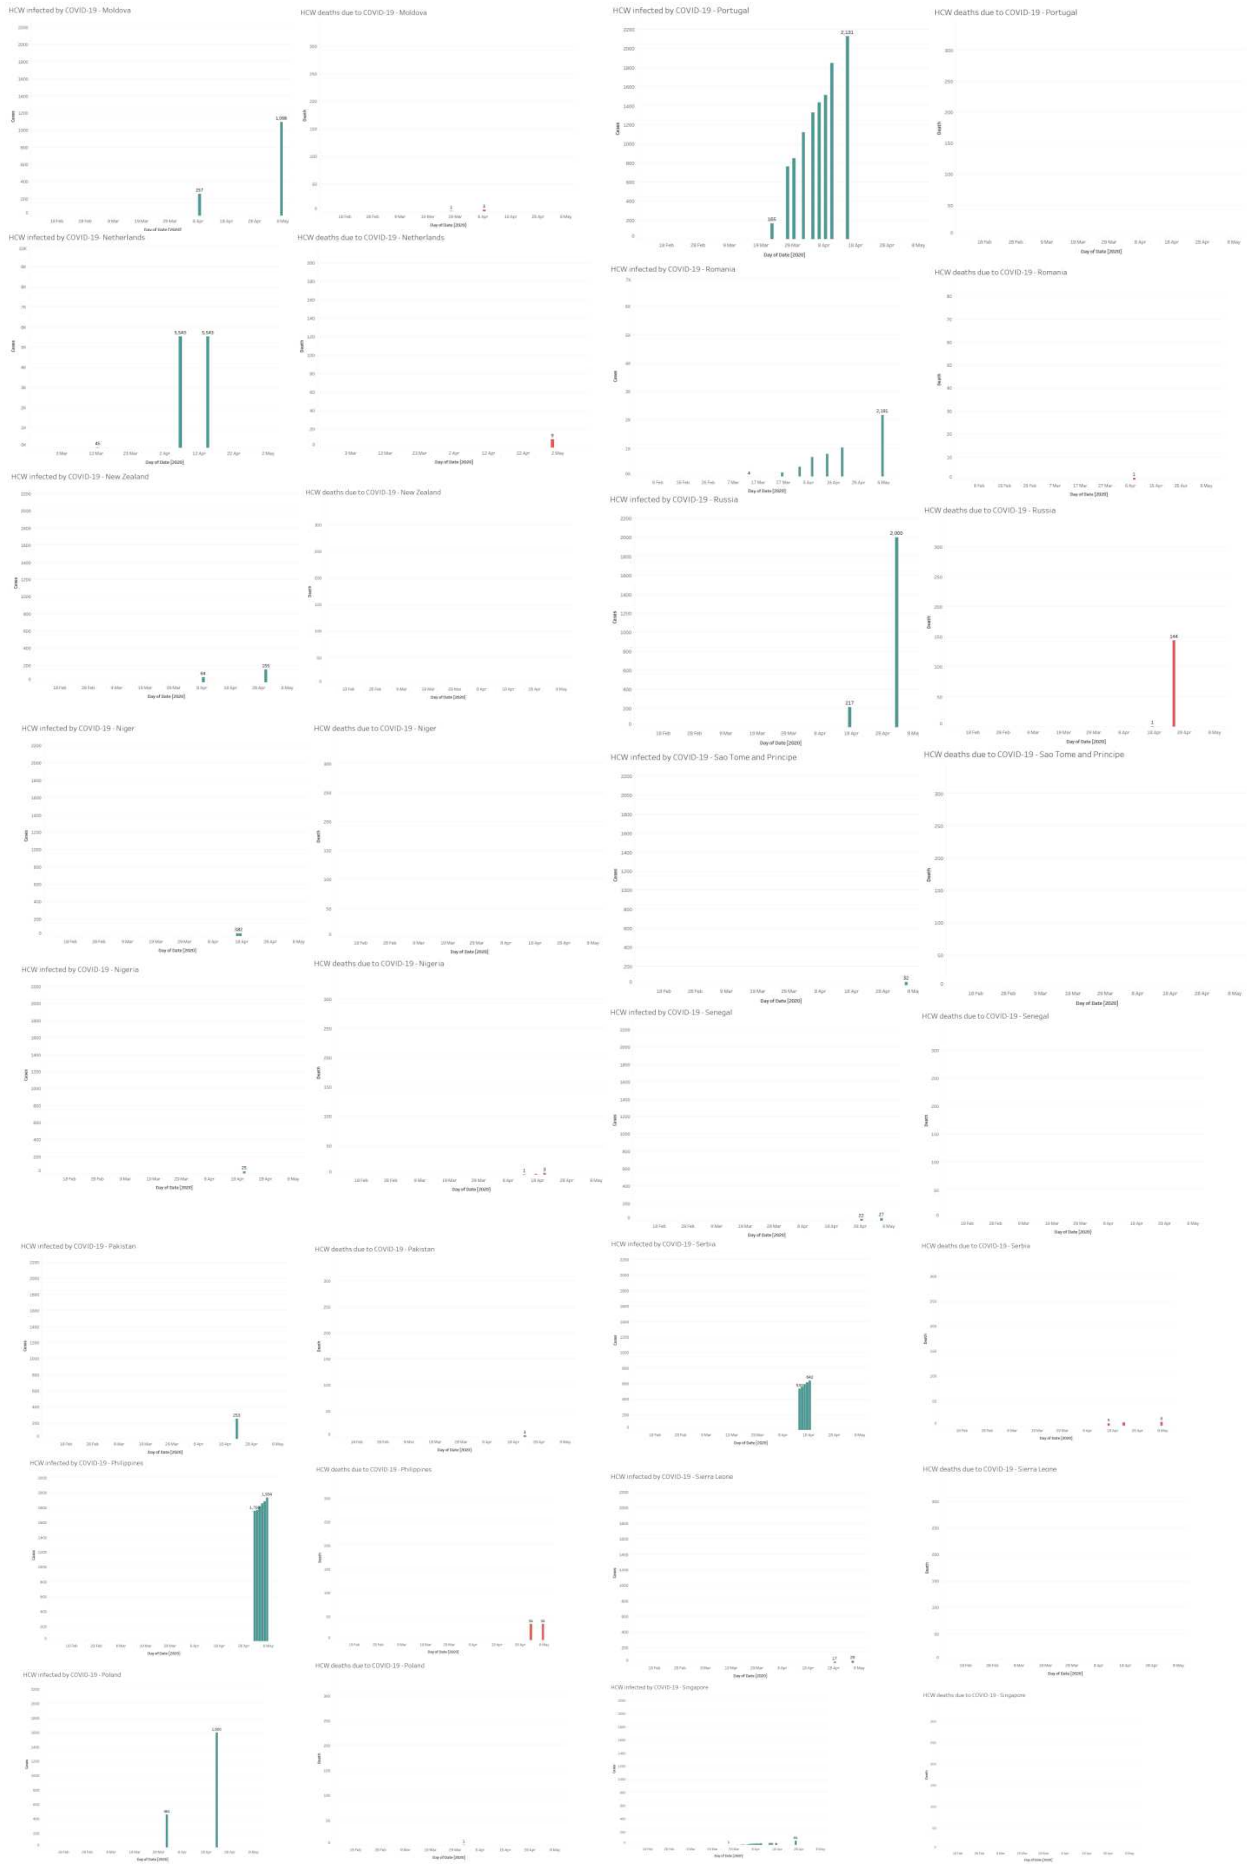

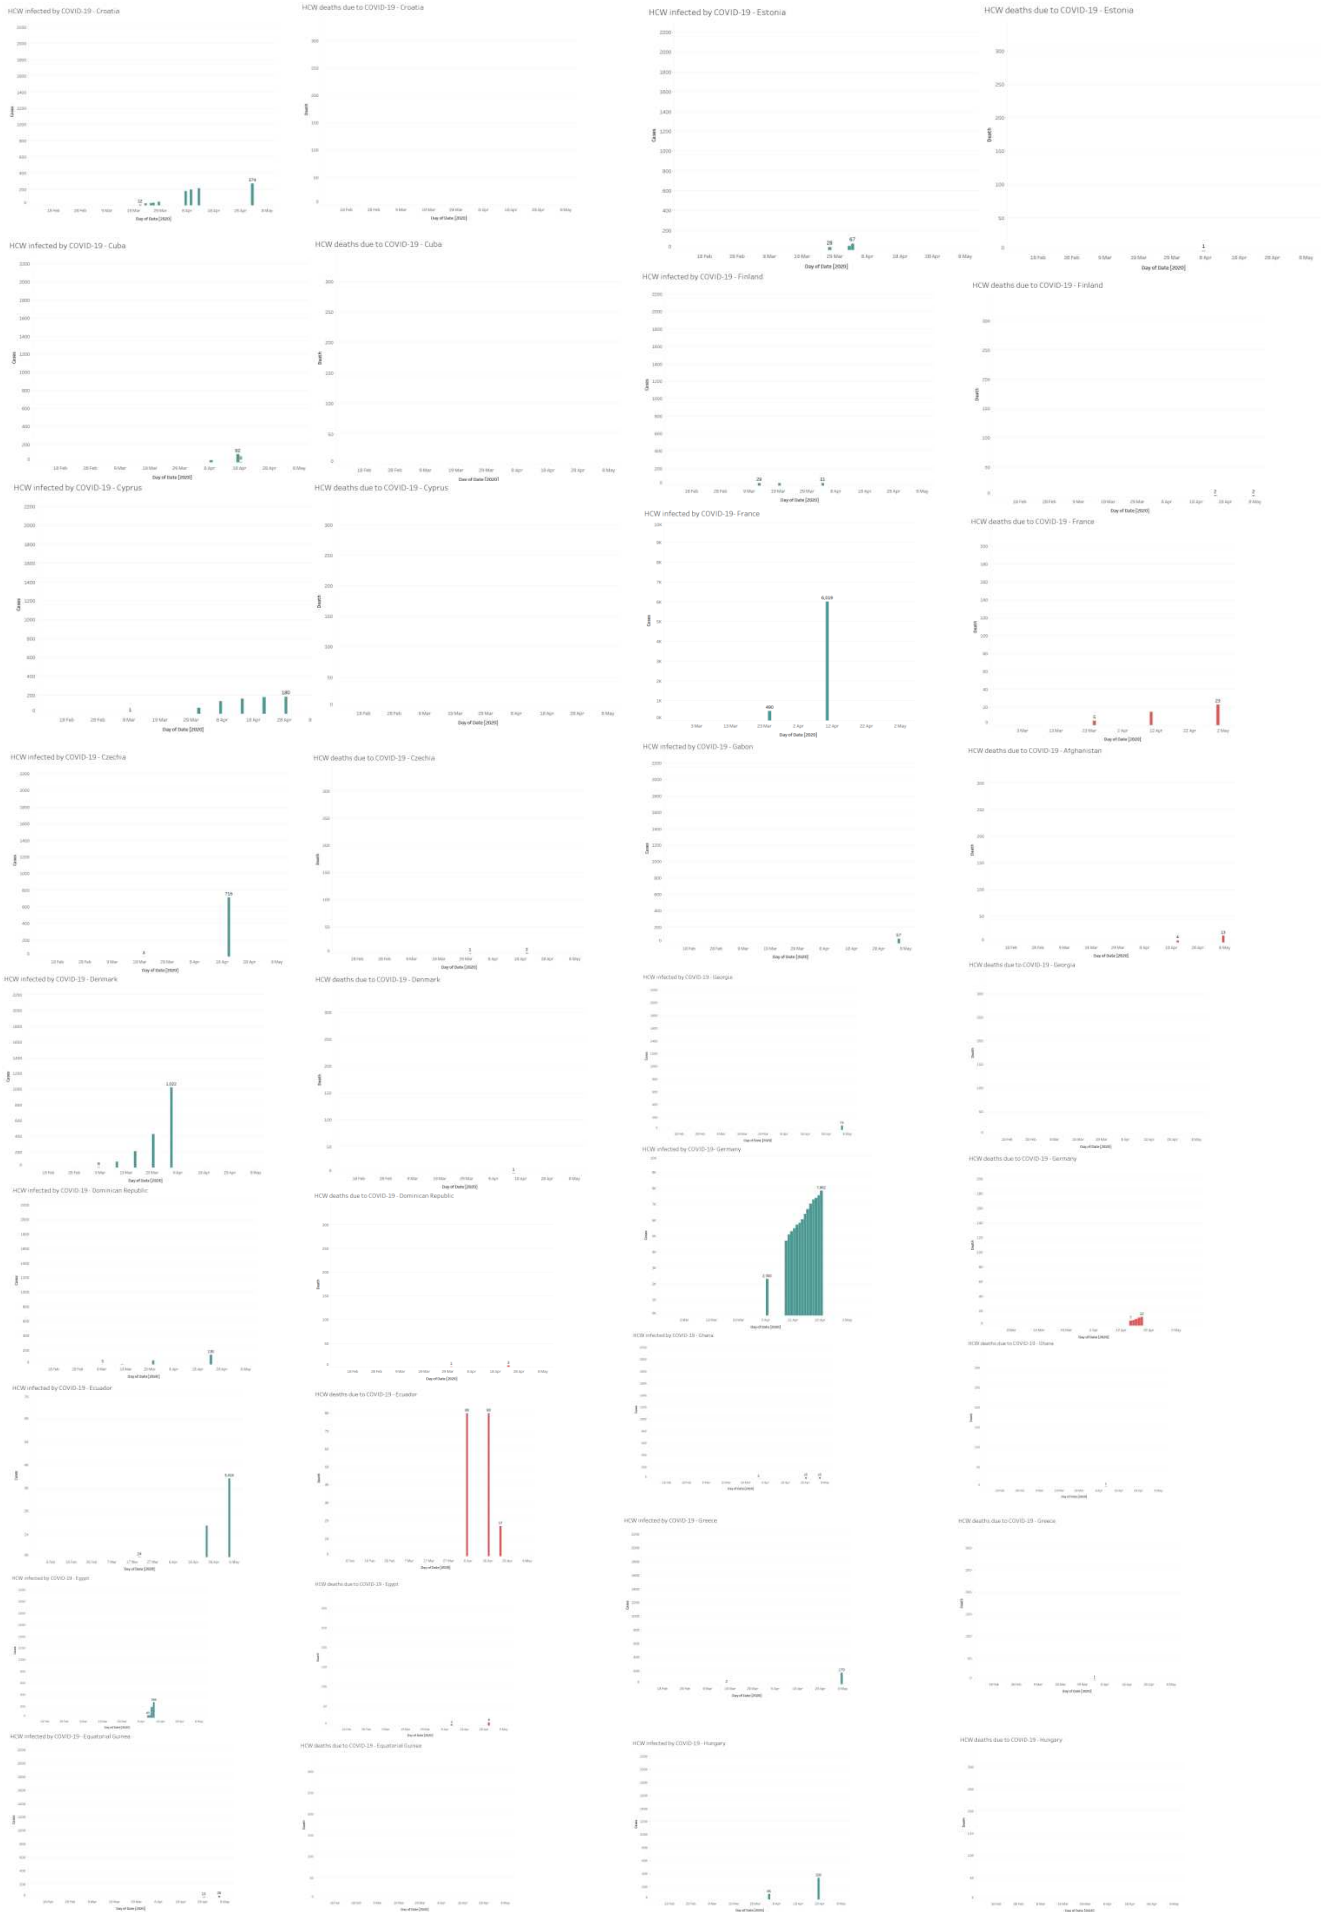

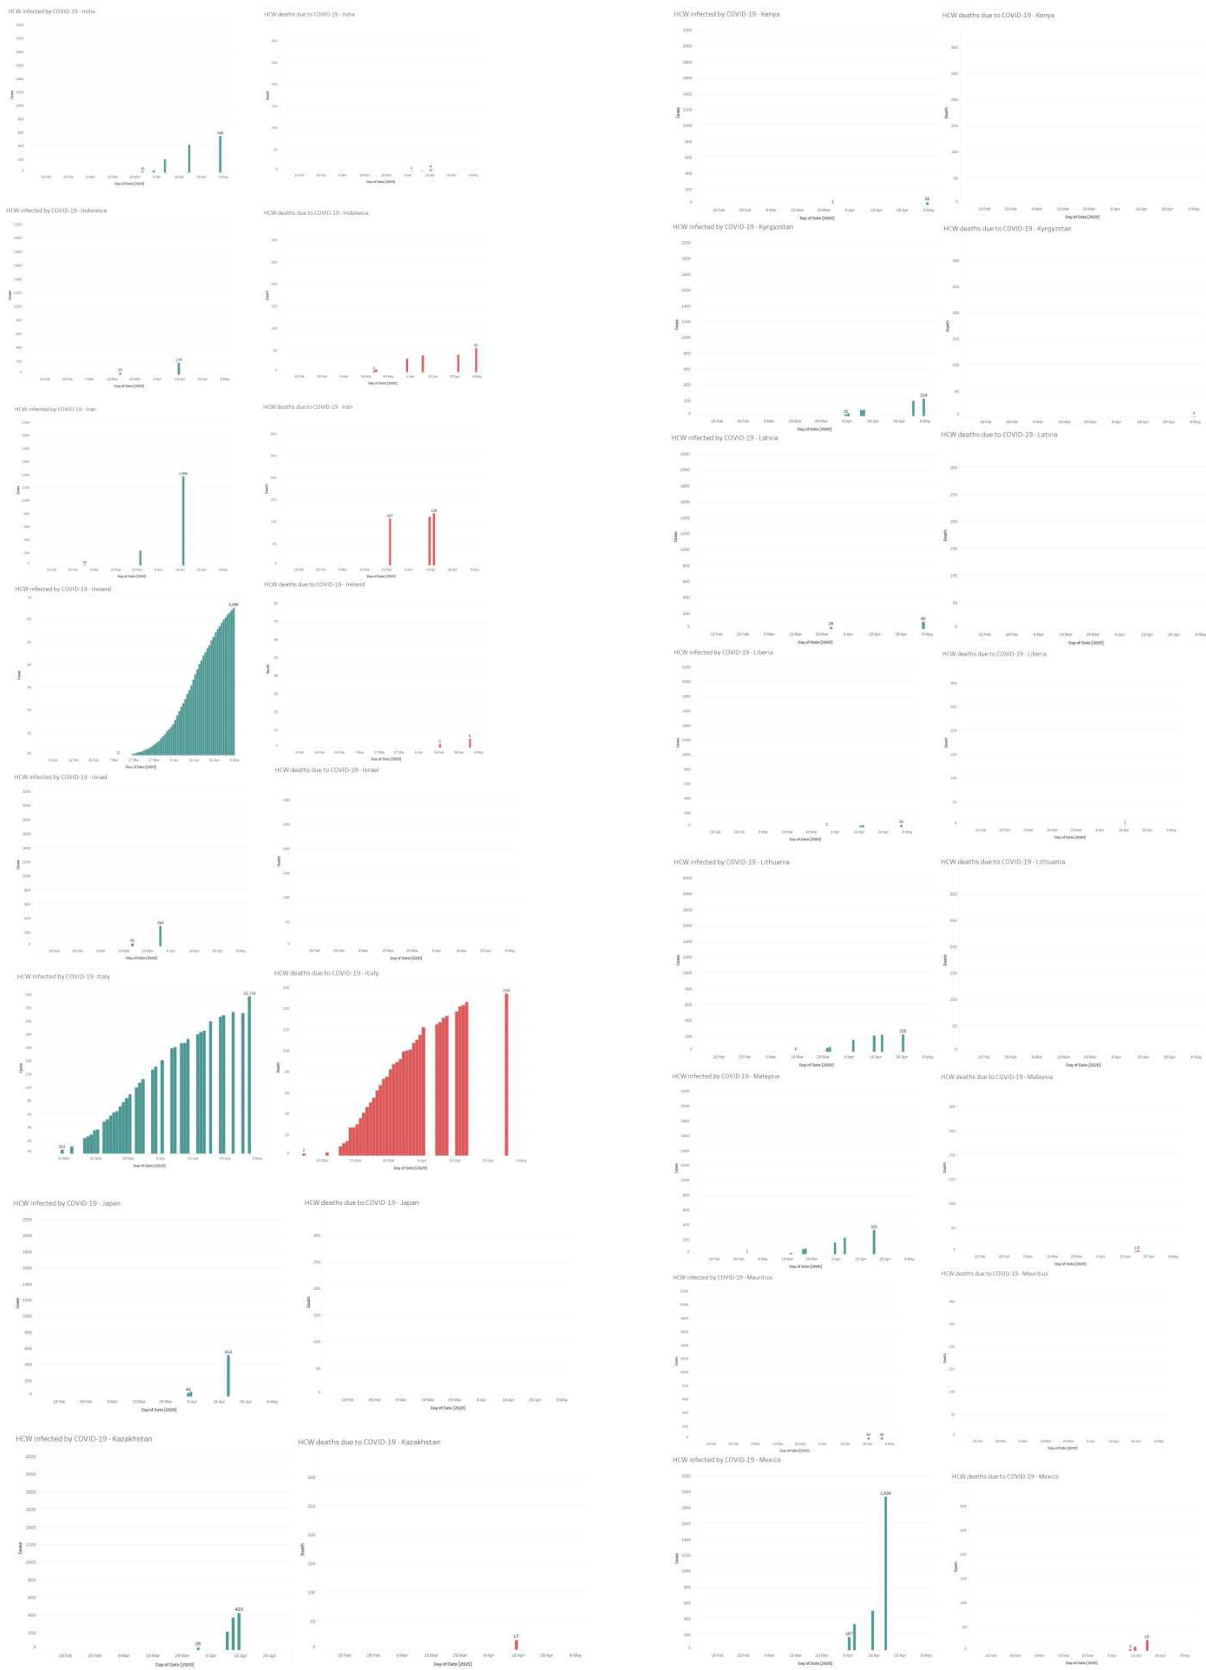

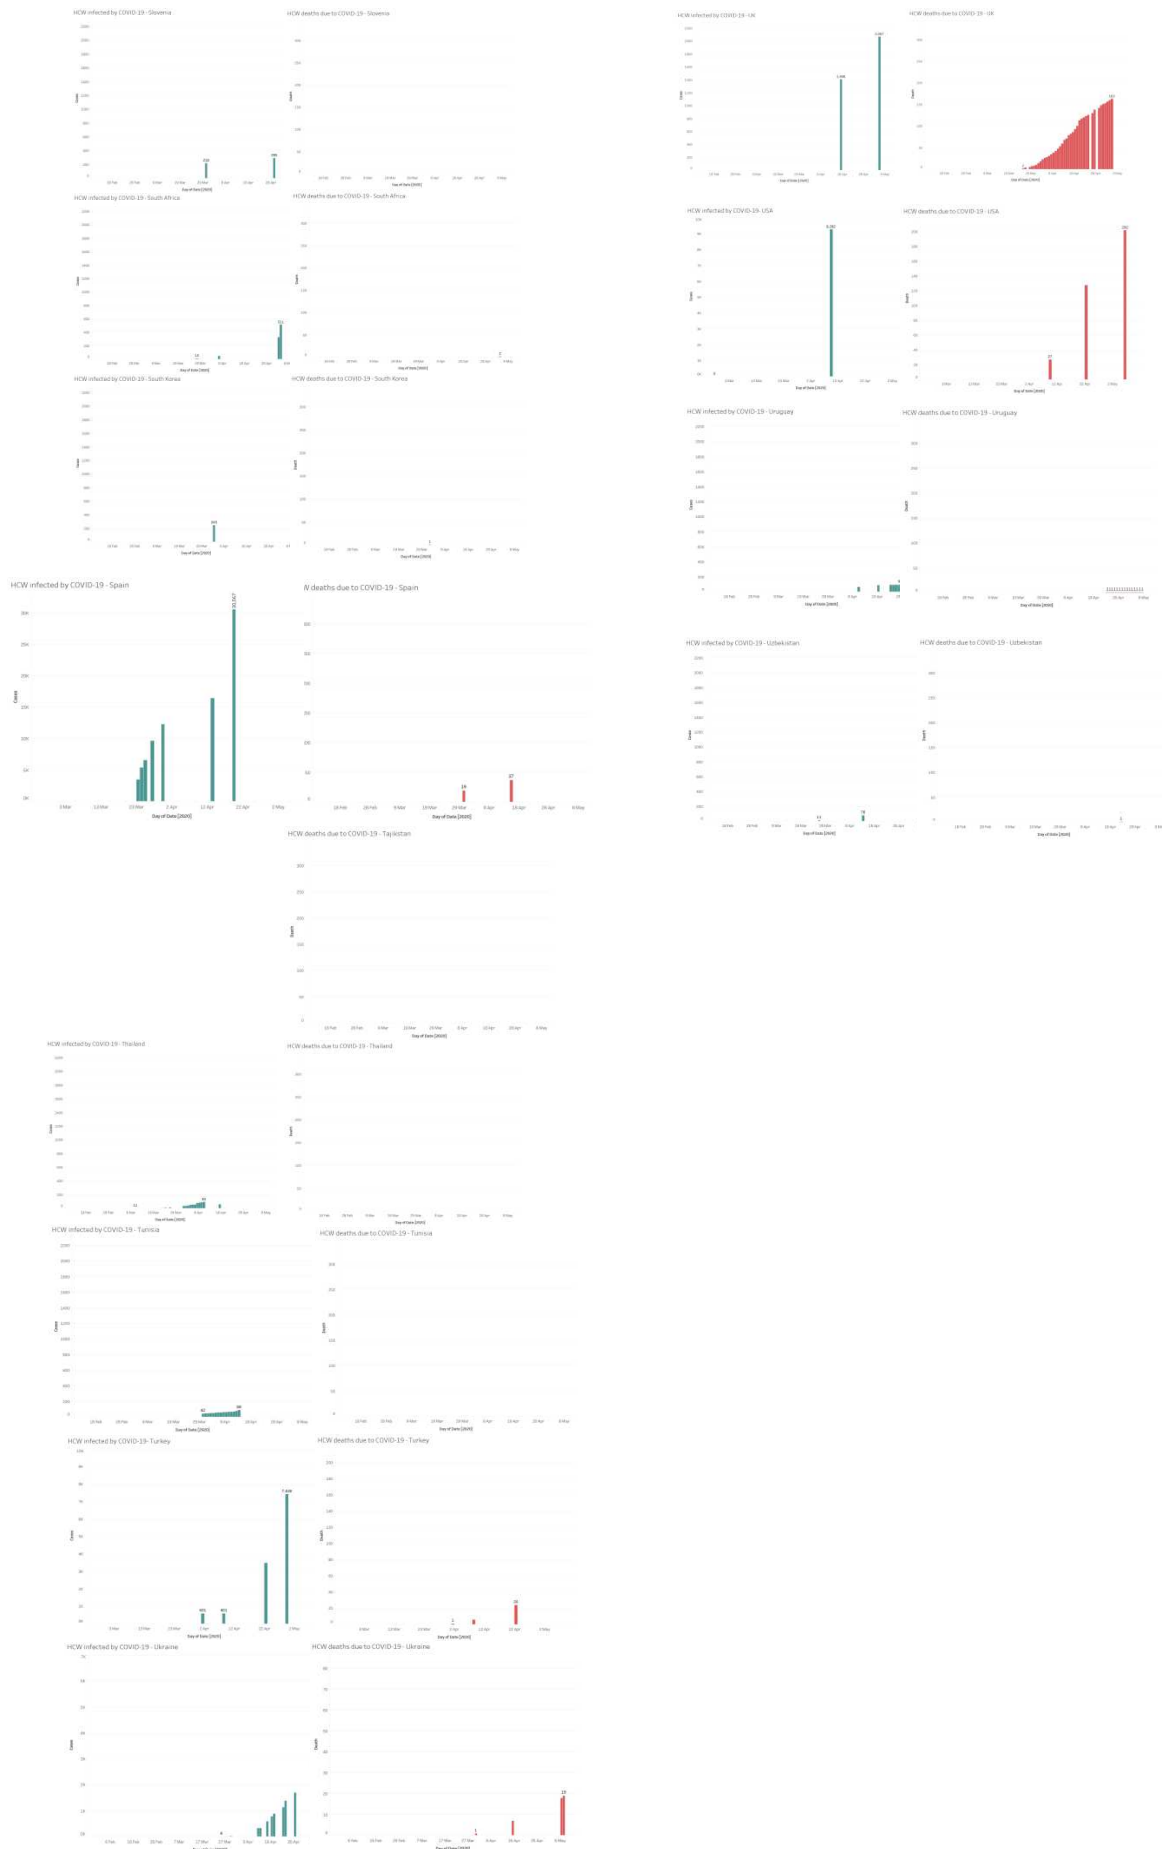

Supplement: bmjgh-2020-003097supp010_data_supplement.pdf [file bmjgh-2020-003097supp010_data_supplement.pdf]
